# Supplementary material for: Quality of oxytocin and misoprostol in health facilities of Rwanda
Source: PubMed Central journal article supplement (PMC7793248; doi:10.1371/journal.pone.0245054), 2021-01-08
Supplement: pone.0245054.s001.pdf [file pone.0245054.s001.pdf]

## SAMPLE SITE & DRUG PURCHASE RECORD

Name of survey site: \_\_\_\_\_ Date and time of visit: \_\_\_\_\_

Description of location: \_\_\_\_\_

Temperature data logger Location: \_\_\_\_\_ Serial number: \_\_\_\_\_

Photo taken (5): YES  NO

| Drug samples collected | Desired quantity | Obtained quantity | QOR reference number | Reason for not obtaining the desired quantity | Brand name | Batch no | Expiry date | Manufacturer, country | Price in Rwf per tabs/vial (if applicable) | Storage conditions according to the manufacturer |                        | Refrigerated (r) / not refrigerated (nr) in original package (op)/out of original package (nop) protected from light (pr) /not protected from light (npr)                                  | 1) Thermometer kept with oxytocics?<br>2) Temperature recorded daily?<br>If yes, please take picture                       |
|------------------------|------------------|-------------------|----------------------|-----------------------------------------------|------------|----------|-------------|-----------------------|--------------------------------------------|--------------------------------------------------|------------------------|--------------------------------------------------------------------------------------------------------------------------------------------------------------------------------------------|----------------------------------------------------------------------------------------------------------------------------|
|                        |                  |                   |                      |                                               |            |          |             |                       |                                            | Temperature in °C                                | Relative humidity in % |                                                                                                                                                                                            |                                                                                                                            |
| Misoprostol 0,2mg tab. | 50               |                   |                      |                                               |            |          |             |                       |                                            |                                                  |                        | (r) <input type="checkbox"/> (nr) <input type="checkbox"/><br>(op) <input type="checkbox"/> (nop) <input type="checkbox"/><br>(pr) <input type="checkbox"/> (npr) <input type="checkbox"/> | 1) yes <input type="checkbox"/> no <input type="checkbox"/><br>2) yes <input type="checkbox"/> no <input type="checkbox"/> |
| Oxytocin 10 IU         | 10               |                   |                      |                                               |            |          |             |                       |                                            |                                                  |                        | (r) <input type="checkbox"/> (nr) <input type="checkbox"/><br>(op) <input type="checkbox"/> (nop) <input type="checkbox"/><br>(pr) <input type="checkbox"/> (npr) <input type="checkbox"/> | 1) yes <input type="checkbox"/> no <input type="checkbox"/><br>2) yes <input type="checkbox"/> no <input type="checkbox"/> |

- If samples are taken without original package, please take picture of original package (showing the name, batch number, expiry date, manufacturing date, name / address of manufacturer)!
- Collected samples were replaced: YES  NO  Collected samples were paid for: YES  (Attach receipt!) NO
- Name of sampling person: \_\_\_\_\_ Signature: \_\_\_\_\_
- Name of person responsible for health facility: \_\_\_\_\_ Signature: \_\_\_\_\_

**S1 Fig.** Sample site & drug purchase record.
