# Supplementary material for: Quality of oxytocin and misoprostol in health facilities of Rwanda
Source: PubMed Central journal article supplement (PMC7793248; doi:10.1371/journal.pone.0245054), 2021-01-08
Supplement: pone.0245054.s002.pdf [file pone.0245054.s002.pdf]

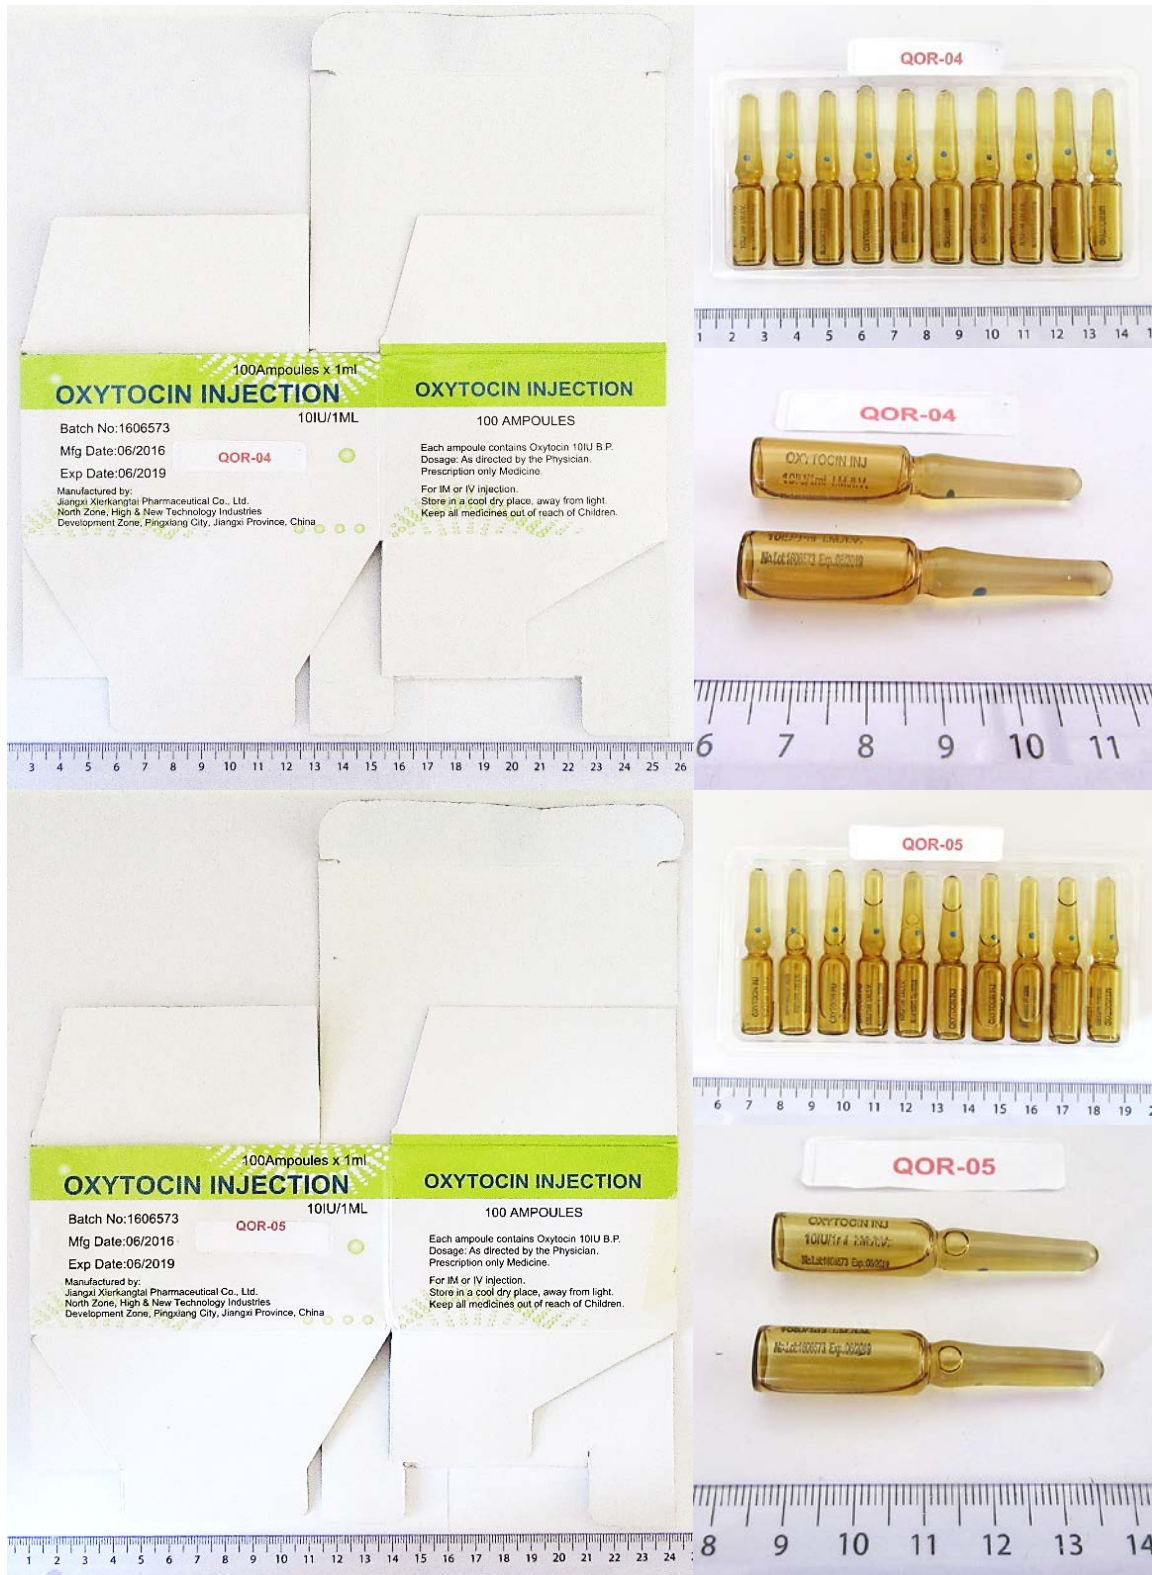

**S2 Fig: Photos of two samples of oxytocin injections, carrying the same batch number but containing different concentrations of benzyl alcohol.**

Top: Sample No. QOR04, containing 0.004% benzyl alcohol.  
 Bottom: Sample No. QOR05, containing 0.9% benzyl alcohol.
