# Supplementary material for: Quality of oxytocin and misoprostol in health facilities of Rwanda
Source: PubMed Central journal article supplement (PMC7793248; doi:10.1371/journal.pone.0245054), 2021-01-08
Supplement: pone.0245054.s003.pdf [file pone.0245054.s003.pdf]

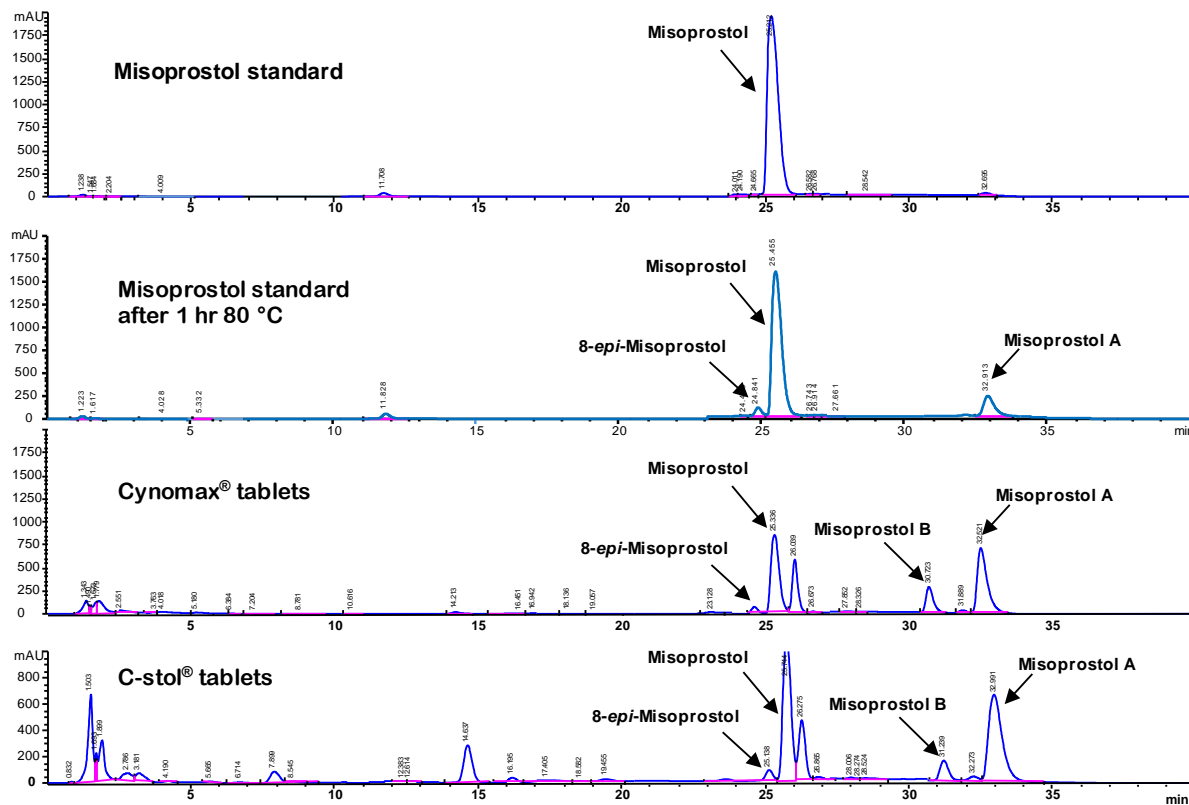

**S3 Fig: HPLC analysis for related substances in two misoprostol samples.**

Cynomax® tablets (batch M8TAB1801) and C-stol® tablets (batch ERW-005) were investigated. See Methods section for experimental details, and Results section for details of the investigated brands and batches.
