# Supplementary material for: Quality of oxytocin and misoprostol in health facilities of Rwanda
Source: PubMed Central journal article supplement (PMC7793248; doi:10.1371/journal.pone.0245054), 2021-01-08
Supplement: pone.0245054.s004.pdf [file pone.0245054.s004.pdf]

**S1 Table. List of included health facilities, number oxytocin vial and misoprostol tablets collected, and recorded oxytocin storage conditions**

| Facility No | Type of facility              | District                         | Sampling site (maternity ward or storage room) | Number of collected misoprostol tablets | Misoprostol storage conditions stated on label | Number of collected oxytocin vials | Oxytocin storage conditions stated on label | Oxytocin storage site | Oxytocin storage shelf: mean kinetic temperature measured over 6 months (°C) | Refrigerator: mean kinetic temperature measured over 6 months (°C) |          |
|-------------|-------------------------------|----------------------------------|------------------------------------------------|-----------------------------------------|------------------------------------------------|------------------------------------|---------------------------------------------|-----------------------|------------------------------------------------------------------------------|--------------------------------------------------------------------|----------|
| 1           | Government district hospital  | Kigali city                      | maternity ward                                 | 50                                      | 20-25°C                                        | 10                                 | 2-8°C                                       | refrigerator          | -                                                                            | <b>9.1</b>                                                         |          |
|             |                               |                                  | storage room                                   | 50; 50 <sup>e</sup>                     | <30°C                                          | 10                                 | room temperature <sup>f</sup>               | shelf                 | 25.3                                                                         | -                                                                  |          |
| 2           |                               |                                  | storage room                                   | 50                                      | <30°C                                          | 10                                 | room temperature                            | shelf                 | 24.2                                                                         | -                                                                  |          |
| 3           | Government referral hospital  | Musanze                          | maternity ward                                 | 0                                       | -                                              | 10                                 | 2-8°C                                       | refrigerator          | -                                                                            | <b>8.5</b>                                                         |          |
|             |                               |                                  | storage room                                   | 60                                      | <30°C                                          | 10                                 | 2-8°C                                       | refrigerator          | -                                                                            | 6.5                                                                |          |
| 4           | Faith-based district hospital | Bugesera                         | maternity ward                                 | 0                                       | -                                              | 6                                  | room temperature                            | shelf                 | 26.3                                                                         | -                                                                  |          |
|             |                               |                                  | storage room                                   | 20                                      | 20-25°C                                        | 10                                 | room temperature                            | shelf                 | 23.4                                                                         | -                                                                  |          |
| 5           |                               | Kamonyi                          | maternity ward                                 | 0                                       | -                                              | 10                                 | 2-8°C                                       | refrigerator          | -                                                                            | 5.4                                                                |          |
|             |                               |                                  | storage room                                   | 51                                      | <30°C                                          | 10                                 | 2-8°C                                       | refrigerator          | -                                                                            | 6.1                                                                |          |
| 6           |                               | Karongi                          | maternity ward                                 | 0                                       | -                                              | 10                                 | 2-8°C                                       | cool box <sup>a</sup> | -                                                                            | <b>15.8<sup>a</sup></b>                                            |          |
|             |                               |                                  | storage room                                   | 50                                      | 15°-25°C                                       | 10                                 | 2-8°C                                       | refrigerator          | -                                                                            | not det.                                                           |          |
| 7           |                               |                                  | maternity ward                                 | 10                                      | 15°-25°C                                       | 10                                 | 2-8°C                                       | refrigerator          | -                                                                            | 6.7                                                                |          |
|             |                               |                                  | storage room                                   | 50                                      | <30°C                                          | 10                                 | 2-8°C                                       | refrigerator          | -                                                                            | 7.1                                                                |          |
| 8           |                               | Muhanga                          | maternity ward                                 | 51                                      | <30°C                                          | 10                                 | room temperature                            | shelf                 | 22.2                                                                         | -                                                                  |          |
|             |                               |                                  | storage room                                   | 50                                      | 20-25°C                                        | 10                                 | room temperature                            | shelf                 | 21.5                                                                         | -                                                                  |          |
| 9           | Government health center      | Bugesera                         | maternity ward                                 | 0                                       | -                                              | 5                                  | room temperature                            | shelf                 | 23.7                                                                         | -                                                                  |          |
|             |                               |                                  | storage room                                   | 13                                      | 20-25°C                                        | 10                                 | room temperature                            | shelf                 | 24.8                                                                         | -                                                                  |          |
| 10          |                               |                                  | maternity ward                                 | 0                                       | -                                              | 10                                 | room temperature                            | shelf                 | 26.0                                                                         | -                                                                  |          |
|             |                               |                                  | storage room                                   | 51                                      | <30°C                                          | 10                                 | room temperature                            | shelf                 | 25.4                                                                         | -                                                                  |          |
| 11          |                               | Kamonyi                          | maternity ward                                 | 0                                       | -                                              | 8                                  | room temperature                            | shelf                 | 23.5                                                                         | -                                                                  |          |
|             |                               |                                  | storage room                                   | 0                                       | -                                              | 10                                 | room temperature                            | shelf                 | 24.4                                                                         | -                                                                  |          |
| 12          |                               |                                  | maternity ward                                 | 0                                       | -                                              | 10                                 | room temperature                            | shelf                 | not det.                                                                     | -                                                                  |          |
|             |                               |                                  | storage room                                   | 0                                       | -                                              | 10                                 | room temperature                            | shelf                 | 25.0                                                                         | -                                                                  |          |
| 13          |                               | Karongi                          | storage room                                   | 0                                       | -                                              | 10                                 | 2-8°C                                       | refrigerator          | -                                                                            | 5.8                                                                |          |
| 14          |                               |                                  | storage room                                   | 0                                       | -                                              | 10                                 | 2-8°C                                       | refrigerator          | -                                                                            | 4.5                                                                |          |
| 15          |                               | Kigali city                      | storage room                                   | 0                                       | -                                              | 10                                 | room temperature                            | shelf                 | 23.7                                                                         | -                                                                  |          |
| 16          |                               |                                  | maternity ward                                 | 0                                       | -                                              | 10                                 | room temperature                            | shelf                 | 24.2                                                                         | -                                                                  |          |
| 17          |                               | Muhanga                          | maternity ward                                 | 0                                       | -                                              | 9                                  | room temperature                            | shelf                 | 22.3                                                                         | -                                                                  |          |
|             |                               |                                  | storage room                                   | 0                                       | -                                              | 10                                 | room temperature                            | shelf                 | 21.4                                                                         | -                                                                  |          |
| 18          |                               |                                  | storage room                                   | 0                                       | -                                              | 10                                 | room temperature                            | shelf                 | 21.4                                                                         | -                                                                  |          |
| 19          |                               | Musanze                          | storage room                                   | 0                                       | -                                              | 10                                 | 2-8°C                                       | refrigerator          | -                                                                            | 7.3                                                                |          |
| 20          |                               |                                  | storage room                                   | 0                                       | -                                              | 10                                 | 2-8°C                                       | refrigerator          | -                                                                            | 5.7                                                                |          |
| 21          |                               | Faith-based health center        | Bugesera                                       | maternity ward                          | 0                                              | -                                  | 10                                          | room temperature      | shelf                                                                        | 23.8                                                               | -        |
|             |                               |                                  |                                                | storage room                            | 0                                              | -                                  | 10                                          | room temperature      | shelf                                                                        | not det.                                                           | -        |
| 22          |                               |                                  |                                                | maternity ward                          | 0                                              | -                                  | 10                                          | room temperature      | shelf                                                                        | 25.1                                                               | -        |
|             | storage room                  |                                  |                                                | 30                                      | 20-25°C                                        | 10                                 | room temperature                            | shelf                 | <b>25.4<sup>g</sup></b>                                                      | -                                                                  |          |
| 23          | Kamonyi                       |                                  | storage room                                   | 0                                       | -                                              | 10                                 | room temperature                            | shelf                 | 22.7                                                                         | -                                                                  |          |
| 24          |                               |                                  | maternity ward                                 | 0                                       | -                                              | 10                                 | room temperature                            | shelf                 | 22.2                                                                         | -                                                                  |          |
|             |                               |                                  | storage room                                   | 0                                       | -                                              | 10                                 | room temperature                            | shelf                 | 22.1                                                                         | -                                                                  |          |
| 25          | Karongi                       |                                  | storage room                                   | 0                                       | -                                              | 10                                 | 2-8°C                                       | refrigerator          | -                                                                            | 4.3                                                                |          |
| 26          |                               |                                  | maternity ward                                 | 0                                       | -                                              | 10                                 | 2-8°C                                       | refrigerator          | -                                                                            | <b>-1.3</b>                                                        |          |
| 27          | Kigali city                   |                                  | storage room                                   | 0                                       | -                                              | 6                                  | 2-8°C                                       | refrigerator          | -                                                                            | 6.5                                                                |          |
| 28          |                               | storage room                     | 0                                              | -                                       | 10                                             | 2-8°C                              | refrigerator                                | -                     | <b>10.5</b>                                                                  |                                                                    |          |
| 29          |                               | maternity ward                   | 0                                              | -                                       | 9                                              | room temperature                   | shelf                                       | 21.0                  | -                                                                            |                                                                    |          |
|             |                               | storage room                     | 0                                              | -                                       | 10                                             | room temperature                   | shelf                                       | 21.9                  | -                                                                            |                                                                    |          |
| 30          | Muhanga                       | maternity ward                   | 0                                              | -                                       | 10                                             | room temperature                   | shelf                                       | 22.7                  | -                                                                            |                                                                    |          |
|             |                               | storage room                     | 0                                              | -                                       | 10                                             | room temperature                   | shelf                                       | 22.4                  | -                                                                            |                                                                    |          |
| 31          | Musanze                       | maternity ward                   | 0                                              | -                                       | 10                                             | 2-8°C                              | refrigerator                                | -                     | not det.                                                                     |                                                                    |          |
|             |                               | storage room                     | 0                                              | -                                       | 10                                             | 2-8°C                              | refrigerator                                | -                     | 5.1                                                                          |                                                                    |          |
| 32          |                               | storage room                     | 0                                              | -                                       | 10                                             | 2-8°C                              | refrigerator                                | -                     | 4.7                                                                          |                                                                    |          |
| 33          | Private clinic                | Muhanga                          | storage room                                   | 0                                       | -                                              | 10                                 | room temperature                            | shelf                 | not det.                                                                     | -                                                                  |          |
| 34          | Retail pharmacy               | Bugesera                         | storage room                                   | 25                                      | no requirements                                | 0                                  | -                                           | n.a.                  | 24.1 <sup>c</sup>                                                            | -                                                                  |          |
| 35          |                               |                                  | storage room                                   | 29                                      | no requirements                                | 0                                  | -                                           | n.a.                  | 24.0 <sup>c</sup>                                                            | -                                                                  |          |
| 36          |                               | Kigali city                      | storage room                                   | 50                                      | no requirements                                | 0                                  | -                                           | n.a.                  | 24.2 <sup>c</sup>                                                            | -                                                                  |          |
| 37          |                               |                                  | storage room                                   | 28                                      | no requirements                                | 0                                  | -                                           | n.a.                  | 23.9 <sup>c</sup>                                                            | -                                                                  |          |
| 38          |                               | Muhanga                          | storage room                                   | 50                                      | no requirements                                | 0                                  | -                                           | n.a.                  | -                                                                            | -                                                                  |          |
| 39          |                               |                                  | storage room                                   | 48                                      | 20-25°C                                        | 0                                  | -                                           | n.a.                  | -                                                                            | -                                                                  |          |
| 40          |                               | Musanze                          | storage room                                   | 50                                      | no requirements                                | 0                                  | -                                           | n.a.                  | -                                                                            | -                                                                  |          |
| 41          |                               | Government central medical store | Kigali city                                    | storage room                            | 0                                              | -                                  | 100;200 <sup>d,e</sup>                      | 2-8°C                 | refrigerator                                                                 | -                                                                  | not det. |
| 42          | Government district pharmacy  | Burera                           | storage room                                   | 250 <sup>d</sup>                        | <30°C                                          | 0                                  | -                                           | n.a.                  | -                                                                            | -                                                                  |          |
| 43          |                               | Muhanga                          | storage room                                   | 200 <sup>d</sup>                        | 20-25°C                                        | 160 <sup>d</sup>                   | room temperature                            | shelf                 | 19.8                                                                         | -                                                                  |          |
| 44          |                               |                                  | storage room                                   | 0                                       | -                                              | 100 <sup>d</sup>                   | room temperature                            | not det. <sup>b</sup> | -                                                                            | -                                                                  |          |
| 45          | Private wholesaler            | Kigali city                      | storage room                                   | 0                                       | -                                              | 100 <sup>d</sup>                   | 2-8°C                                       | not det. <sup>b</sup> | -                                                                            | -                                                                  |          |
| 46          |                               |                                  | storage room                                   | 252 <sup>d</sup>                        | no requirements                                | 100 <sup>d</sup>                   | 2-8°C                                       | not det. <sup>b</sup> | -                                                                            | -                                                                  |          |

Storage conditions which deviate from manufacturers' requirements are given in **bold, underlined** letters.

n.a. = not applicable

not det. = not determined (temperature logger not placed, lost after placement, or no data recorded).

<sup>a</sup> Oxytocin was stored in this maternity ward in a cool box, reportedly only ordered for immediate use.

<sup>b</sup> From private wholesalers, samples were purchased through a retail pharmacy using a mystery shopper approach. Therefore, storage conditions were not determined, and temperatures data loggers were not placed.

<sup>c</sup> In a few pharmacies, temperature loggers were placed although they did not stock oxytocin.

<sup>d</sup> Higher number of tablets/vials purchased as replacement samples and for additional stability testing.

<sup>e</sup> Two brands collected in one sampling site.

<sup>f</sup> Storage requirement stated on packaging: "Store in a cool dry place, away from light". Storage requirement stated on the package insert: "Store in a dark place at room temperature, protect from light."

<sup>g</sup> Exceeds storage temperature of misoprostol recommended by the manufacturer of the respective sample.
