# Supplementary material for: Quality of oxytocin and misoprostol in health facilities of Rwanda
Source: PubMed Central journal article supplement (PMC7793248; doi:10.1371/journal.pone.0245054), 2021-01-08
Supplement: pone.0245054.s005.pdf [file pone.0245054.s005.pdf]

**S2 Table. Results of chemical analysis of all oxytocin samples**

| Brand name and stated manufacturer                                    | Stated storage temperature requirement | Batch N°  | Manufacture/Expiry Date | Facility No. | Facility type            | Site in facility | Mean assay (% of declared content) | RSD assay          | Mean pH value | RSD pH value | Age of samples (months) <sup>a</sup> |
|-----------------------------------------------------------------------|----------------------------------------|-----------|-------------------------|--------------|--------------------------|------------------|------------------------------------|--------------------|---------------|--------------|--------------------------------------|
| Oxytocin injection; Jiangxi Xierkangtai Pharmaceutical Co. Ltd; China | Room temperature                       | 1606573   | Jun 16/ Jun 19          | 2            | gov. hospital            | stor.            | 96.1% <sup>b</sup>                 | 6.62% <sup>c</sup> | 4.14          | 0.98%        | 30                                   |
|                                                                       |                                        |           |                         | 4            | faith-b. hospital        | mat.             | 102.7%                             | 1.56%              | 4.03          | 0.48%        | 30                                   |
|                                                                       |                                        |           |                         | 8            | faith-b. hospital        | stor.            | 105.5%                             | 2.22%              | 4.00          | 0.68%        | 30                                   |
|                                                                       |                                        |           |                         |              |                          | mat.             | 99.2%                              | 0.68%              | 4.48          | 2.17         | 24                                   |
|                                                                       |                                        |           |                         | 9            | gov. HC                  | stor.            | 99.9%                              | 1.31%              | 4.40          | 0.96         | 24                                   |
|                                                                       |                                        |           |                         |              |                          | mat.             | 101.3%                             | 0.55%              | 4.05          | 0.89%        | 30                                   |
|                                                                       |                                        |           |                         | 11           | gov. HC                  | stor.            | 101.1%                             | 1.66%              | 4.05          | 0.76%        | 30                                   |
|                                                                       |                                        |           |                         |              |                          | mat.             | 100.5%                             | 1.73%              | 4.05          | 0.34%        | 30                                   |
|                                                                       |                                        |           |                         | 12           | gov. HC                  | stor.            | 100.7%                             | 1.73%              | 4.05          | 0.33%        | 30                                   |
|                                                                       |                                        |           |                         |              |                          | mat.             | 100.4%                             | 2.29%              | 4.08          | 0.62%        | 30                                   |
|                                                                       |                                        |           |                         | 17           | gov. HC                  | stor.            | 99.8%                              | 1.29%              | 4.07          | 0.73%        | 30                                   |
|                                                                       |                                        |           |                         |              |                          | mat.             | 95.8%                              | 1.71%              | 4.56          | 3.27         | 24                                   |
|                                                                       |                                        |           |                         | 18           | gov. HC                  | stor.            | 97.9%                              | 0.52%              | 4.50          | 1.33         | 24                                   |
|                                                                       |                                        |           |                         |              |                          | stor.            | 99.0%                              | 0.88%              | 4.44          | 0.97         | 24                                   |
|                                                                       |                                        | 23        | faith-b. HC             | stor.        | 99.1%                    | 1.05%            | 4.12                               | 0.18%              | 30            |              |                                      |
|                                                                       |                                        | 24        | faith-b. HC             | mat.         | 100.4%                   | 1.99%            | 4.06                               | 0.48%              | 30            |              |                                      |
|                                                                       |                                        |           |                         | stor.        | 95.6%                    | 4.94%            | 4.19                               | 4.38%              | 30            |              |                                      |
|                                                                       |                                        | 29        | faith-b. HC             | mat.         | 98.2%                    | 0.75%            | 4.46                               | 0.73               | 24            |              |                                      |
|                                                                       |                                        |           |                         | stor.        | 98.0%                    | 0.79%            | 4.48                               | 0.84               | 24            |              |                                      |
|                                                                       |                                        | 30        | faith-b. HC             | mat.         | 99.5%                    | 1.32%            | 4.38                               | 1.18               | 24            |              |                                      |
|                                                                       |                                        |           |                         | stor.        | 99.7%                    | 1.18%            | 4.39                               | 0.77               | 24            |              |                                      |
|                                                                       |                                        | 33        | private clinic          | stor.        | 100.7%                   | 0.96%            | 4.41                               | 0.94               | 24            |              |                                      |
|                                                                       |                                        | 43        | distr. pharm.           | stor.        | 101.5%                   | 0.45%            | 4.06                               | 0.32%              | 23            |              |                                      |
|                                                                       |                                        | <b>44</b> | <b>wholesaler</b>       | <b>stor.</b> | <b>90.3%<sup>b</sup></b> | <b>0.72%</b>     | <b>4.08</b>                        | <b>0.84%</b>       | <b>23</b>     |              |                                      |
| 1604521                                                               | Apr 16/ Apr 19                         | 1         | gov. hospital           | stor.        | 119.3%                   | 2.09%            | 3.85                               | 0.13%              | 32            |              |                                      |
|                                                                       |                                        | 10        | gov. HC                 | mat.         | 118.0%                   | 1.98%            | 3.83                               | 0.48%              | 32            |              |                                      |
|                                                                       |                                        |           |                         | stor.        | 117.2%                   | 0.52%            | 3.82                               | 0.51%              | 32            |              |                                      |
|                                                                       |                                        | 15        | gov. HC                 | stor.        | 119.9%                   | 3.25%            | 3.84                               | 0.30%              | 32            |              |                                      |
|                                                                       |                                        | 16        | gov. HC                 | mat.         | 120.6%                   | 2.24%            | 3.82                               | 0.11%              | 32            |              |                                      |
|                                                                       |                                        | 21        | faith-b. HC             | stor.        | 117.6%                   | 1.02%            | 3.84                               | 0.44%              | 32            |              |                                      |
| stor.                                                                 | 121.5%                                 |           |                         | 1.61%        | 3.82                     | 0.48%            | 32                                 |                    |               |              |                                      |
| 22                                                                    | faith-b. HC                            | mat.      | 117.3%                  | 1.38%        | 3.80                     | 0.26%            | 32                                 |                    |               |              |                                      |
|                                                                       |                                        | stor.     | 117.8%                  | 2.31%        | 3.78                     | 0.47%            | 32                                 |                    |               |              |                                      |
| Steroxine 10 IU/1 ml <sup>d</sup> ; Laboratoires Sterop; Belgium      | 2-8°C                                  | 160042    | Feb 16/ Jan 19          | 46           | wholesaler               | stor.            | 107.8%                             | 0.62%              | 3.79          | 0.22%        | 27                                   |
|                                                                       |                                        | 160269    | Sep 16/ Aug 19          | 45           | wholesaler               | stor.            | 99.6%                              | 1.11%              | 3.98          | 0.57%        | 20                                   |
| Oxytocin 10 IU/ml; AS GRINDEKS, Latvia <sup>e</sup>                   | 2-8°C                                  | 37611016  | Oct 16/ Oct 20          | 1            | gov. hospital            | mat.             | 102.8%                             | 1.63%              | 4.11          | 0.13%        | 26                                   |
|                                                                       |                                        |           |                         | 5            | faith-b. hospital        | mat.             | 102.1%                             | 1.99%              | 4.09          | 0.15%        | 26                                   |
|                                                                       |                                        |           |                         |              |                          | stor.            | 101.9%                             | 3.29%              | 4.10          | 0.22%        | 26                                   |
|                                                                       |                                        | 20        | gov. HC                 | stor.        | 99.9%                    | 0.74%            | 4.11                               | 0.10%              | 26            |              |                                      |
| 37711116                                                              | Nov 16/ Nov 20                         | 41        | CMS                     | stor.        | 100.9%                   | 0.82%            | 4.09                               | 0.64%              | 18            |              |                                      |
| Oxytocin 10; Rotex-medica GmbH Arzneimittelwerk; Germany              | 2-8°C                                  | 70779A    | Sep 17/ Sep 20          | 3            | gov. hospital            | mat.             | 104.1%                             | 2.96%              | 4.06          | 0.39%        | 15                                   |
|                                                                       |                                        |           |                         |              |                          | stor.            | 102.0%                             | 0.26%              | 4.02          | 0.20%        | 15                                   |
|                                                                       |                                        |           |                         | 6            | faith-b. hospital        | mat.             | 103.7%                             | 2.09%              | 4.09          | 0.40%        | 15                                   |
|                                                                       |                                        |           |                         |              |                          | stor.            | 103.1%                             | 1.53%              | 4.06          | 0.35%        | 15                                   |
|                                                                       |                                        |           |                         | 7            | faith-b. hospital        | mat.             | 103.9%                             | 1.92%              | 4.02          | 0.10%        | 15                                   |
|                                                                       |                                        |           |                         |              |                          | stor.            | 103.8%                             | 1.84%              | 4.03          | 0.10%        | 15                                   |
|                                                                       |                                        |           |                         | 13           | gov. HC                  | stor.            | 103.8%                             | 1.67%              | 4.02          | 0.19%        | 15                                   |
|                                                                       |                                        |           |                         | 14           | gov. HC                  | stor.            | 104.2%                             | 1.93%              | 4.05          | 0.30%        | 15                                   |
|                                                                       |                                        |           |                         | 19           | gov. HC                  | stor.            | 102.6%                             | 0.44%              | 4.00          | 0.10%        | 15                                   |
|                                                                       |                                        |           |                         | 25           | faith-b. HC              | stor.            | 103.6%                             | 1.76%              | 4.02          | 0.24%        | 15                                   |
|                                                                       |                                        |           |                         | 26           | faith-b. HC              | mat.             | 103.9%                             | 1.67%              | 4.01          | 0.19%        | 15                                   |
|                                                                       |                                        |           |                         | 27           | faith-b. HC              | stor.            | 105.9%                             | 3.96%              | 3.97          | 0.19%        | 15                                   |
|                                                                       |                                        |           |                         | 28           | faith-b. HC              | stor.            | 105.2%                             | 2.37%              | 3.99          | 0.21%        | 15                                   |
| 31                                                                    | faith-b. HC                            | mat.      | 103.4%                  | 0.86%        | 4.00                     | 0.14%            | 15                                 |                    |               |              |                                      |
|                                                                       |                                        | stor.     | 105.4%                  | 2.44%        | 3.99                     | 0.19%            | 15                                 |                    |               |              |                                      |
| 32                                                                    | faith-b. HC                            | stor.     | 104.6%                  | 2.51%        | 4.01                     | 0.20%            | 15                                 |                    |               |              |                                      |
| 41                                                                    | CMS                                    | stor.     | 102.4%                  | 0.89%        | 3.99                     | 0.47%            | 8                                  |                    |               |              |                                      |

RSD = relative standard deviation; gov. = government; faith-b. = faith-based; HC = health center; CMS = government central medical store; stor. = storage room; mat. = maternity ward. The sample found to contain only 0.004 % benzyl alcohol is shown in **bold print**.

<sup>a</sup> Age of sample at time of analysis.

<sup>b</sup> Deviating concentration of the preservative benzyl alcohol observed, see main text.

<sup>c</sup> See text for explanation of the high standard deviation observed for this specific sample.

<sup>d</sup> Batch 160269 was labeled with the unbranded generic name "Oxytocin 10 IU/1 ml", all other information was identical as in batch 160042.

<sup>e</sup> Marketing authorization holder: Peckforton Pharmaceuticals Ltd., United Kingdom
