# Supplementary material for: Quality of oxytocin and misoprostol in health facilities of Rwanda
Source: PubMed Central journal article supplement (PMC7793248; doi:10.1371/journal.pone.0245054), 2021-01-08
Supplement: pone.0245054.s006.pdf [file pone.0245054.s006.pdf]

**S3 Table. Results of chemical analysis of all misoprostol samples**

| Brand name and stated manufacturer                                                   | Stated storage requirements                                       | Batch N°                        | Manu-<br>facture/<br>Expiry<br>Date | Faci-<br>lity<br>no. | Facility type           | Site<br>in<br>faci-<br>lity | Mean<br>assay<br>(% of<br>declared<br>content) | RSD<br>assay | Mean<br>dissolution<br>(% of<br>declared<br>content) | RSD<br>disso-<br>lution | Age of<br>samples<br>(months)<br>at time of<br>analysis |
|--------------------------------------------------------------------------------------|-------------------------------------------------------------------|---------------------------------|-------------------------------------|----------------------|-------------------------|-----------------------------|------------------------------------------------|--------------|------------------------------------------------------|-------------------------|---------------------------------------------------------|
| Cytotec® 200 µg,<br>Piramal Healthcare<br>UK Limited; United<br>Kingdom <sup>a</sup> | No special storage<br>requirements <sup>b</sup>                   | B15445 <sup>a</sup>             | Dec 16 <sup>c</sup> /<br>Nov 19     | 38                   | retail pharm.           | stor.                       | 104.2%                                         | 0.13%        | 104.2%                                               | 0.61%                   | 18                                                      |
|                                                                                      |                                                                   |                                 |                                     | 40                   | retail pharm.           | stor.                       | 94.7%                                          | 0.27%        | 103.5%                                               | 2.79%                   | 24                                                      |
|                                                                                      |                                                                   | B17173 <sup>a</sup>             | Jul 17 <sup>c</sup> /<br>Jun 20     | 1                    | gov. hospital           | stor.                       | 95.9%                                          | 0.19%        | 100.1%                                               | 1.45%                   | 17                                                      |
|                                                                                      |                                                                   |                                 |                                     | 34                   | retail pharm.           | stor.                       | 94.8%                                          | 0.29%        | 101.2%                                               | 2.19%                   | 17                                                      |
|                                                                                      |                                                                   |                                 |                                     | 35                   | retail pharm.           | stor.                       | 94.6%                                          | 0.35%        | 100.1%                                               | 2.81%                   | 17                                                      |
|                                                                                      |                                                                   |                                 |                                     | 36                   | retail pharm.           | stor.                       | 94.8%                                          | 0.58%        | 100.8%                                               | 1.59%                   | 17                                                      |
|                                                                                      |                                                                   |                                 |                                     | 37                   | retail pharm.           | stor.                       | 95.6%                                          | 0.48%        | 101.5%                                               | 3.05%                   | 17                                                      |
|                                                                                      |                                                                   |                                 |                                     | 46                   | wholesaler              | stor.                       | 102.4%                                         | 1.13%        | 97.5%                                                | 2.82%                   | 10                                                      |
|                                                                                      | B18097 <sup>b</sup>                                               | Nov 17 <sup>c</sup> /<br>Oct 20 | 6                                   | faith-b. hospital    | stor.                   | 95.1%                       | 0.56%                                          | 90.6%        | 4.49%                                                | 13                      |                                                         |
|                                                                                      |                                                                   |                                 | 7                                   | faith-b. hospital    | mat.                    | 95.5%                       | 3.80%                                          | 102.8%       | 2.69%                                                | 13                      |                                                         |
| Ace Miso®, Acme<br>Formulation Pvt.<br>Ltd.; India                                   | Do not store above<br>30°C, protect from<br>light                 | ACE160963                       | Sep 16/<br>Aug 18                   | 42                   | gov. district<br>pharm. | stor.                       | 102.0%                                         | 0.44%        | 97.7%                                                | 2.59%                   | 20                                                      |
| MIZO®, SYNOKEM<br>Pharmaceuticals<br>LTD; India                                      | Store at a<br>temperature not<br>exceeding 30°C at a<br>dry place | E6SGFT010                       | Jun 16/<br>May 18                   | 8                    | faith-b. hospital       | mat.                        | 98.4%                                          | 0.02%        | 101.2%                                               | 3.51%                   | 24                                                      |
|                                                                                      |                                                                   | E6SGLT004                       | Dec 16/<br>Nov 18                   | 10                   | gov. HC                 | stor.                       | 92.1%                                          | 1.62%        | 98.1%                                                | 3.18%                   | 24                                                      |
| China resources,<br>ZIZHU<br>Pharmaceuticals Co<br>Ltd; China                        | Store at a tempera-<br>ture not exceeding 30<br>°C                | 45180301                        | Feb 18/<br>Feb 20                   | 1                    | gov. hospital           | stor.                       | 95.8%                                          | 0.20%        | 97.7%                                                | 2.31%                   | 10                                                      |
|                                                                                      |                                                                   |                                 |                                     | 3                    | gov. hospital           | stor.                       | 94.8%                                          | 0.16%        | 100.1%                                               | 2.64%                   | 10                                                      |
| C-stol®, CORONA<br>Remedies Pvt Ltd;<br>India                                        | Store below 30°C.<br>Protect from light and<br>moisture           | ERW-005                         | Mar 18/<br>Feb 21                   | 2                    | gov. hospital           | stor.                       | 46.8%                                          | 1.33%        | 32.9%                                                | 15.61%                  | 9                                                       |
|                                                                                      |                                                                   |                                 |                                     | 5                    | faith-b. hospital       | stor.                       | 46.2%                                          | 0.14%        | 33.6%                                                | 6.82%                   | 9                                                       |
|                                                                                      |                                                                   |                                 |                                     | 7                    | faith-b. hospital       | stor.                       | 48.5%                                          | 2.96%        | 36.4%                                                | 4.53%                   | 9                                                       |
| Cynomax®,<br>MAXTAR BIO-<br>GENICS; India                                            | Store at 20° to 25°C<br>in a dry area                             | M8TAB1801                       | May 18/<br>Apr 20                   | 1                    | gov. hospital           | mat.                        | 42.5%                                          | 0.51%        | 39.8%                                                | 1.35%                   | 7                                                       |
|                                                                                      |                                                                   |                                 |                                     | 4                    | faith-b. hospital       | stor.                       | 44.6%                                          | 0.95%        | 39.3%                                                | 4.15%                   | 7                                                       |
|                                                                                      |                                                                   |                                 |                                     | 9                    | gov. HC                 | stor.                       | 45.6%                                          | 1.07%        | 41.1%                                                | 3.53%                   | 7                                                       |
|                                                                                      |                                                                   |                                 |                                     | 22                   | faith-b. HC             | stor.                       | 44.9%                                          | 0.27%        | 41.2%                                                | 2.37%                   | 7                                                       |
|                                                                                      |                                                                   | MTYX-1604                       | Aug 16/<br>Jul 18                   | 8                    | faith-b. hospital       | stor.                       | 48.6%                                          | 0.06%        | 46.4%                                                | 3.36%                   | 22                                                      |
|                                                                                      |                                                                   |                                 |                                     | 39                   | retail pharm.           | stor.                       | 47.1%                                          | 0.04%        | 45.3%                                                | 1.57%                   | 22                                                      |
|                                                                                      |                                                                   |                                 |                                     | 43                   | gov. district<br>pharm. | stor.                       | 47.6%                                          | 0.24%        | 47.6%                                                | 4.49%                   | 21                                                      |

RSD = relative standard deviation

gov. = government

faith-b. = faith-based

HC = health center

pharm. = pharmacy

stor. = storage room

mat. = maternity ward.

<sup>a</sup> Marketing authorization holder: Pfizer Holding, France.

<sup>b</sup> Marketing authorization holder: Continental Pharma Inc., Belgium.

<sup>c</sup> Package insert: "Tenir hors de la vue et de la portée des enfants. Pas de précaution particulière de conservation". I.e.: "Keep out of sight and reach of children. No special storage requirements."

<sup>d</sup> Manufacturing date not stated on packaging. Shelf-life listed according to information from the websites [www.hpra.ie](http://www.hpra.ie) and [www.medicines.org.uk/emc](http://www.medicines.org.uk/emc).
